# Supplementary material for: Chemosynthetic and photosynthetic bacteria contribute differentially to primary production across a steep desert aridity gradient
Source: PubMed Central journal article supplement (PMC8528921; doi:10.1038/s41396-021-01001-0), 2021-05-25

## **Supplementary information for**

# **‘Chemosynthetic and photosynthetic bacteria contribute differentially to primary production across a steep desert aridity gradient’**

Sean K. Bay \* <sup>1,2</sup>, David W. Waite<sup>3,4</sup>, Xiyang Dong<sup>5</sup>, Osnat Gillor<sup>6</sup>, Steven L. Chown<sup>2</sup>, Philip Hugenholtz<sup>3</sup>, Chris Greening \* <sup>1,2</sup>

<sup>1</sup> Department of Microbiology, Biomedicine Discovery Institute, Monash University, Clayton, VIC 3800, Australia

<sup>2</sup> School of Biological Sciences, Monash University, Clayton, VIC 3800, Australia

<sup>3</sup> Australian Centre for Ecogenomics, School of Chemistry and Molecular Biosciences, St Lucia, QLD 4072, Australia

<sup>4</sup> School of Biological Sciences, University of Auckland, Auckland 1010, New Zealand

<sup>5</sup> School of Marine Sciences, Sun Yat-Sen University, Zhuhai 519082, China

<sup>6</sup> Zuckerberg Institute for Water Research, Blaustein Institutes for Desert Research, Ben Gurion University of the Negev, Sde Boker, Israel

\* Correspondence should be addressed to:

A/Prof Chris Greening ([chris.greening@monash.edu](mailto:chris.greening@monash.edu))

Dr Sean K. Bay ([sean.bay1@monash.edu](mailto:sean.bay1@monash.edu))

## Supplementary Tables

**Table S1 (xlsx).** Summary of sampling design, sample attributes, and taxa identified through 16S rRNA gene amplicon sequencing and metagenomic profiling of the 16S rRNA gene, 18S rRNA gene, and *rplB* gene.

**Table S2 (xlsx).** Details and statistics of microbial abundance, alpha diversity, and beta diversity across the aridity gradient.

**Table S3 (xlsx).** Relative abundance of bacteria and archaea at phylum and class levels in sampled biocrusts and topsoils, and analysis of differences across climatic zones and plots based on SIMPER analysis.

**Table S4 (xlsx).** Distribution of metabolic genes in metagenomic short reads based on homology-based searches.

**Table S5 (xlsx).** Assembly statistics and taxonomic classification of metagenome-assembled genomes.

**Table S6 (xlsx).** Distribution and sequences of metabolic genes in metagenome-assembled genomes.

**Table S7 (xlsx).** Amino acid sequences of the [NiFe]-hydrogenase and RuBisCO catalytic subunits detected in the metagenome-assembled genomes and unbinned contigs.

**Table S8 (xlsx).** Rates and statistics of H<sub>2</sub> oxidation and CO<sub>2</sub> fixation measured for biocrusts and topsoils under both dry and wet conditions.

## Supplementary Figures

**Figure S1.** Comparison of rarefaction curves and rarefying thresholds (dotted blue line) for taxonomic profiling based on 16S rRNA gene amplicon sequencing and metagenomic sequencing. Results are shown for **(a)** 16S rRNA gene amplicon sequence variants (ASVs), **(b)** metagenomic *rpIB* operational taxonomic units (OTUs; SingleM), **(c)** metagenomic 16S rRNA gene nearest taxonomic units (NTUs, PhyloFlash), and **(d)** metagenomic 18S rRNA gene nearest taxonomic units (NTUs, PhyloFlash).

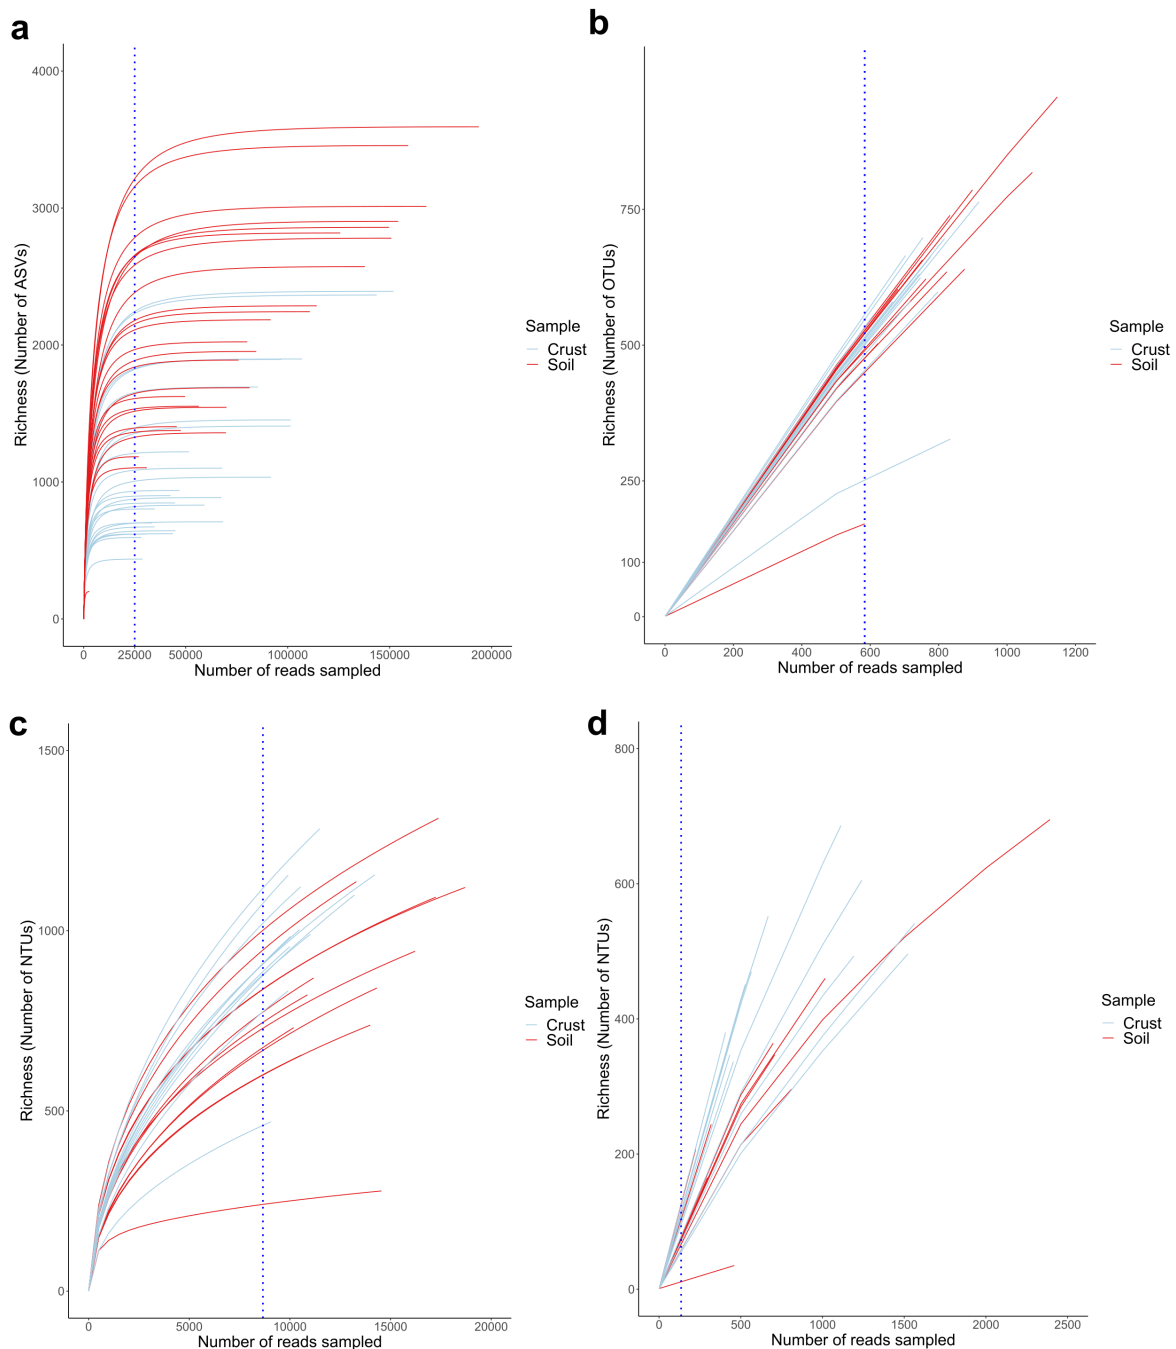

**Figure S2.** Comparison of estimates of bacterial/archaeal composition, richness, and beta diversity based on amplicon and metagenomic sequencing. Stacked bar charts show class-level relative abundance based on **(a)** 16S rRNA gene amplicon sequencing (n = 48), **(b)** metagenomic 16S rRNA gene sequences (n = 24; as per **Fig. 1c**), and **(c)** metagenomic *rplB* gene sequences (n = 24). Boxplots of estimated richness (Chao1) are shown based on **(d)** metagenomic 16S rRNA gene sequences and **(f)** metagenomic *rplB* gene sequences (equivalent results based on 16S rRNA gene amplicon sequencing shown in **Fig. 1d**). Beta diversity (Bray-Curtis dissimilarity) PCoA ordinations are shown based on **(e)** metagenomic 16S rRNA gene sequences and **(g)** metagenomic *rplB* gene sequences (equivalent results based on 16S rRNA gene amplicon sequencing shown in **Fig. 1e**).

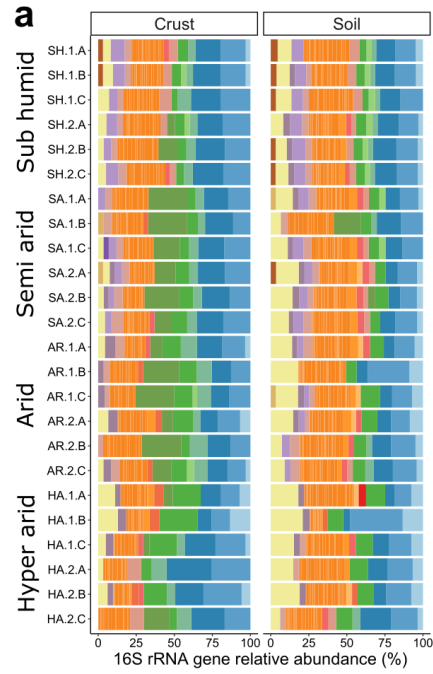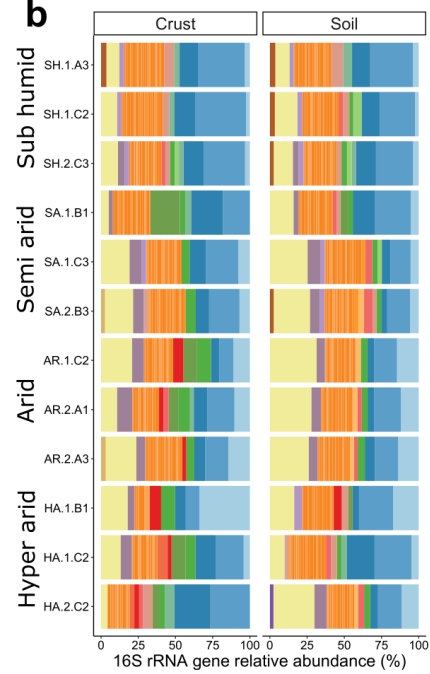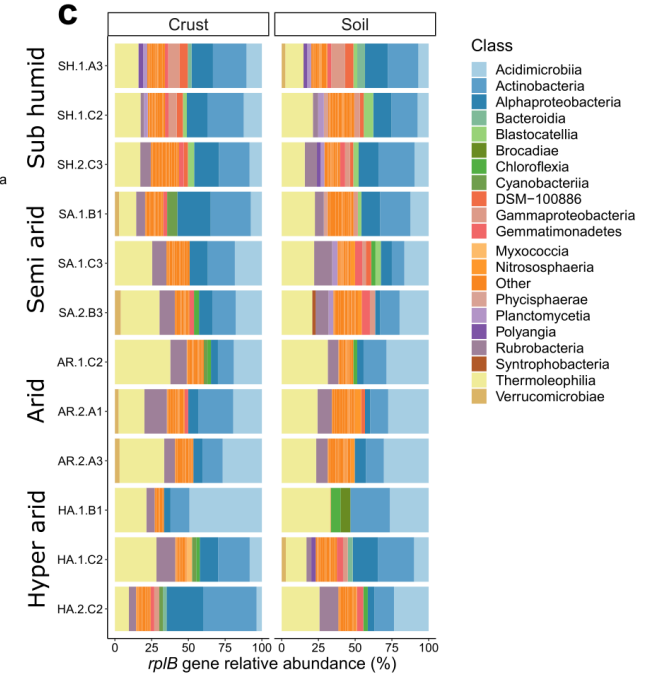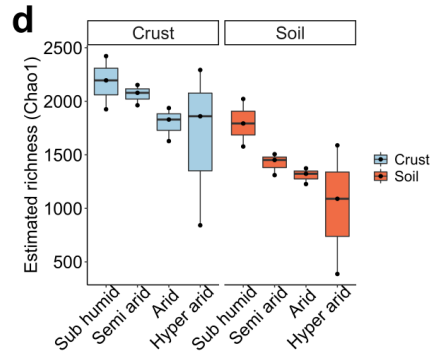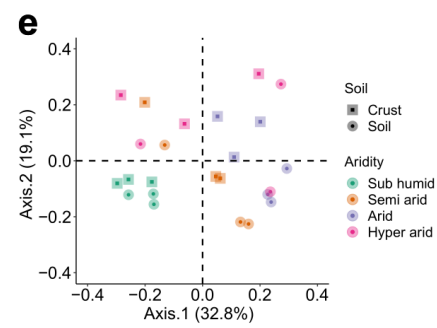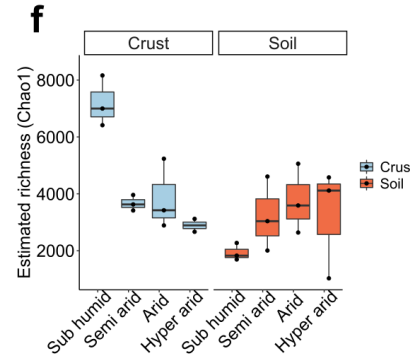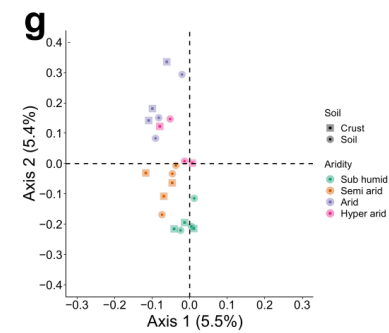

**Figure S3.** Similarity percentage analysis (SIMPER) of relative contribution of different microbial classes to composition change between climatic zones based on 16S rRNA gene amplicon sequencing. Shown are the top 24 taxa contributing to 80% of community compositional changes between climatic zones. Bars represent mean values for the biocrusts (n = 24; six per zone) and topsoils (n = 24; six per zone). For each value, one standard deviation is shown in black error bars.

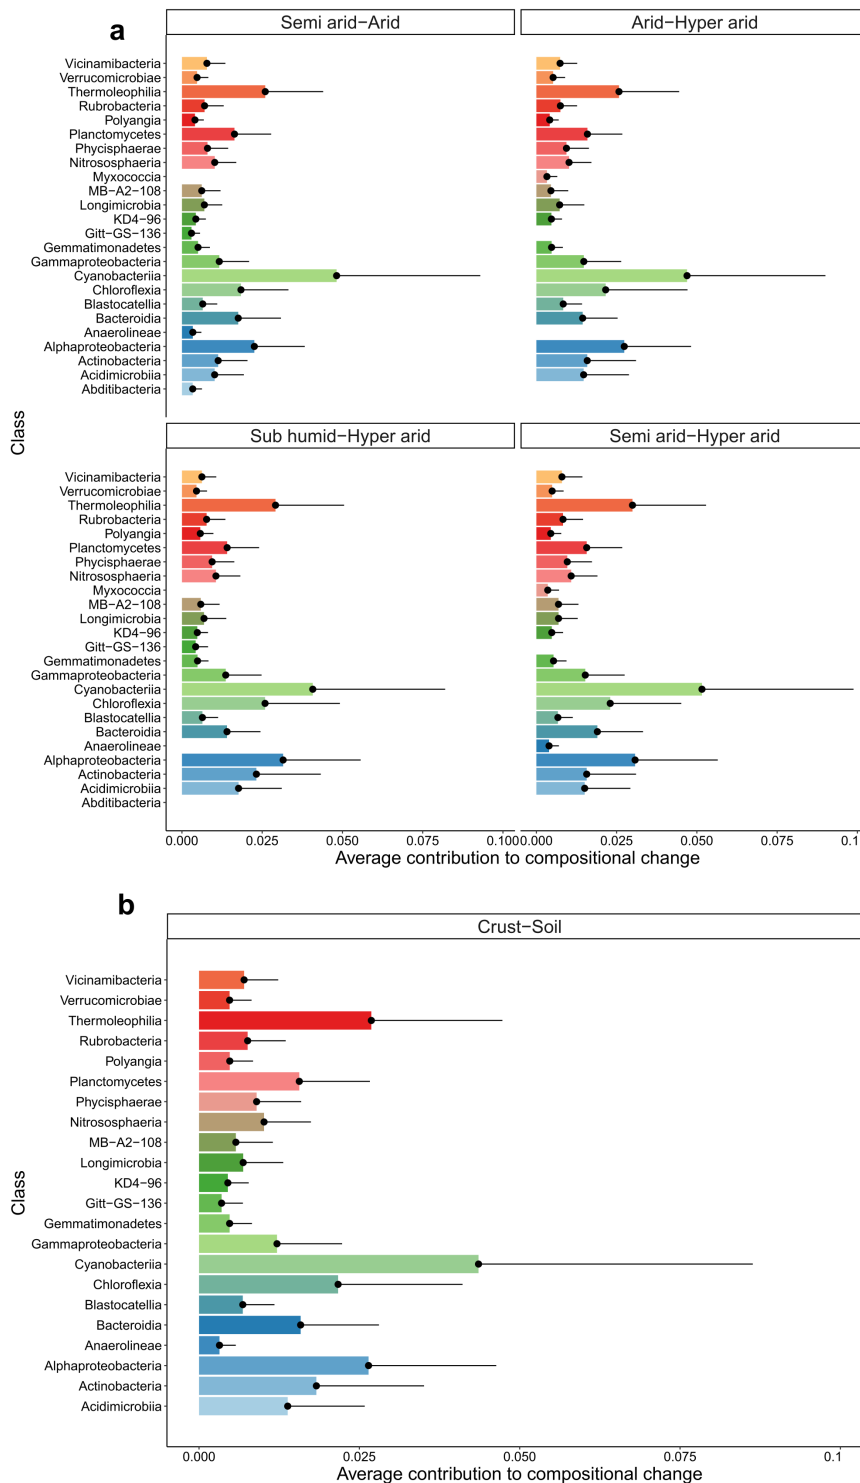

**Figure S4.** Stacked barchart showing the genus-level abundance of cyanobacterial genera detected along the aridity gradient based on 16S rRNA gene amplicon sequencing. Genera were classified according to the Genome Taxonomy Database (GTDB). Vampirovibrionales and Obscuribacteraceae affiliate with the non-photosynthetic classes, whereas the other genera affiliated with the photosynthetic class Cyanobacteriia.

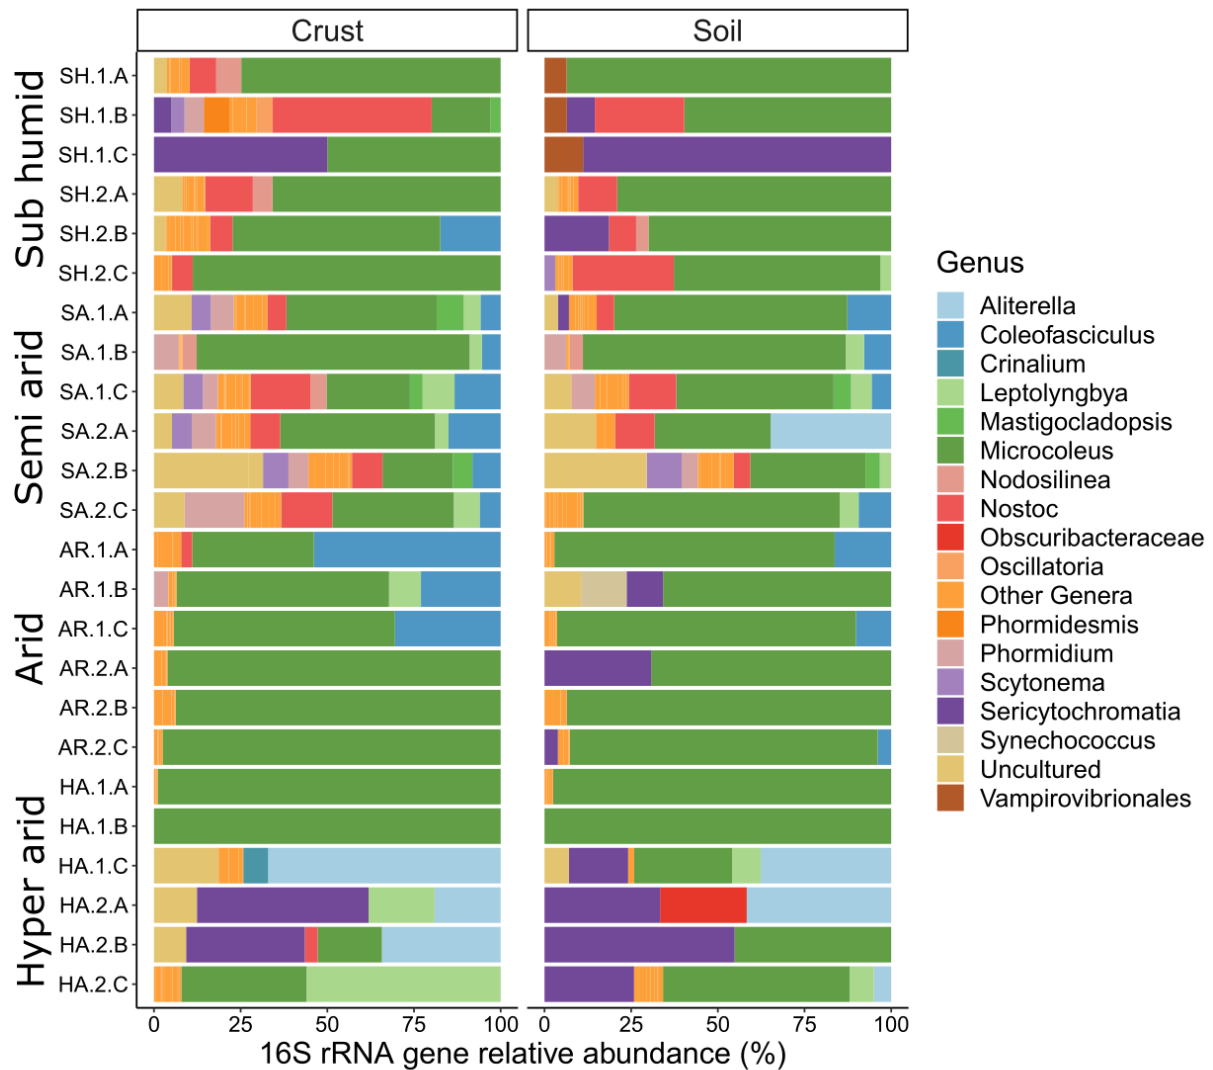

**Figure S5.** Eukaryotic community composition, estimated richness, and beta diversity based on metagenomic 18S rRNA gene sequences. **(a)** Stacked bar chart showing the relative abundance of major eukaryotic divisions detected along the aridity gradient (n = 24). **(b)** Boxplots showing estimated richness by sample type and climatic zone. **(c)** Beta diversity (Bray-Curtis dissimilarity) PCoA ordinations visualising differences by sample type and climatic zone.



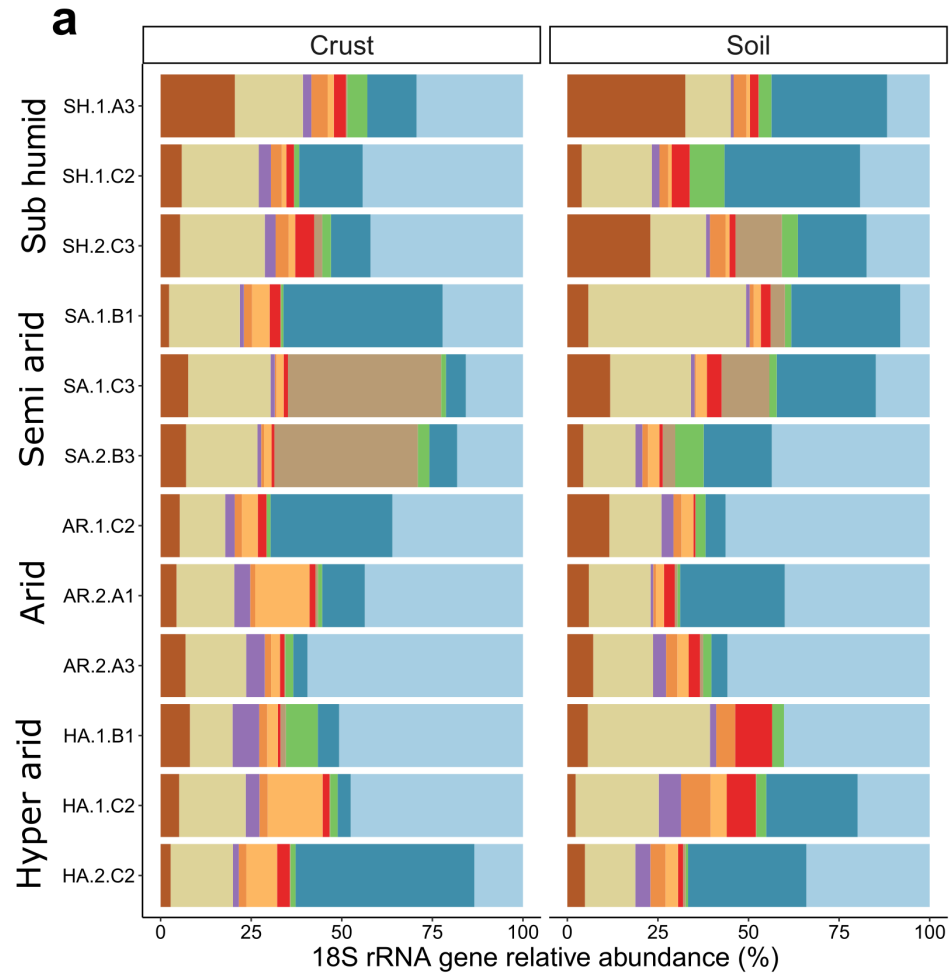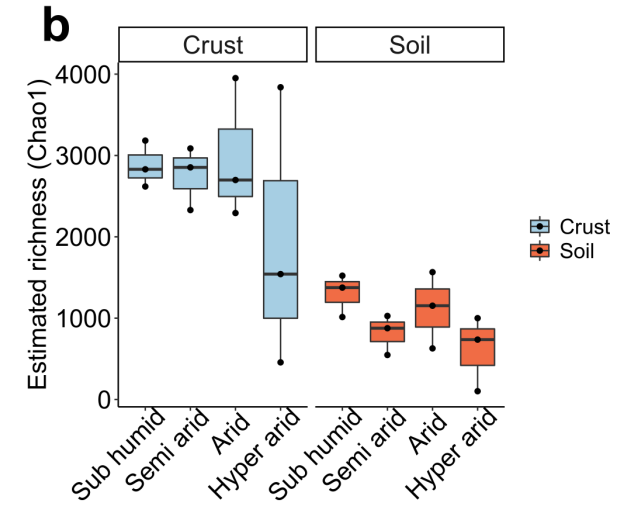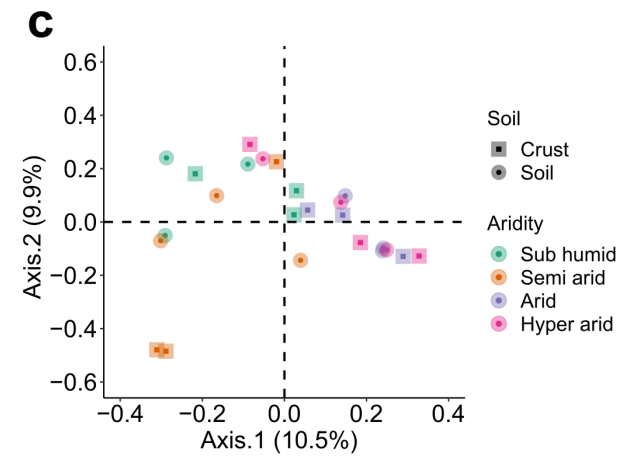



**Figure S7.** Linear models showing the correlation between physicochemical variables and the community proportion predicted to encode **(a)** group 1h and 1l [NiFe]-hydrogenases, and **(b)** type IA, IB, and IE RuBisCO. Shown are the subset of six uncorrelated edaphic chemical drivers measured along the aridity gradient.  $R^2$  values show the proportion of variance in the H<sub>2</sub> oxidation rates explained by the environmental predictor and shaded ribbons represent 95% confidence intervals.

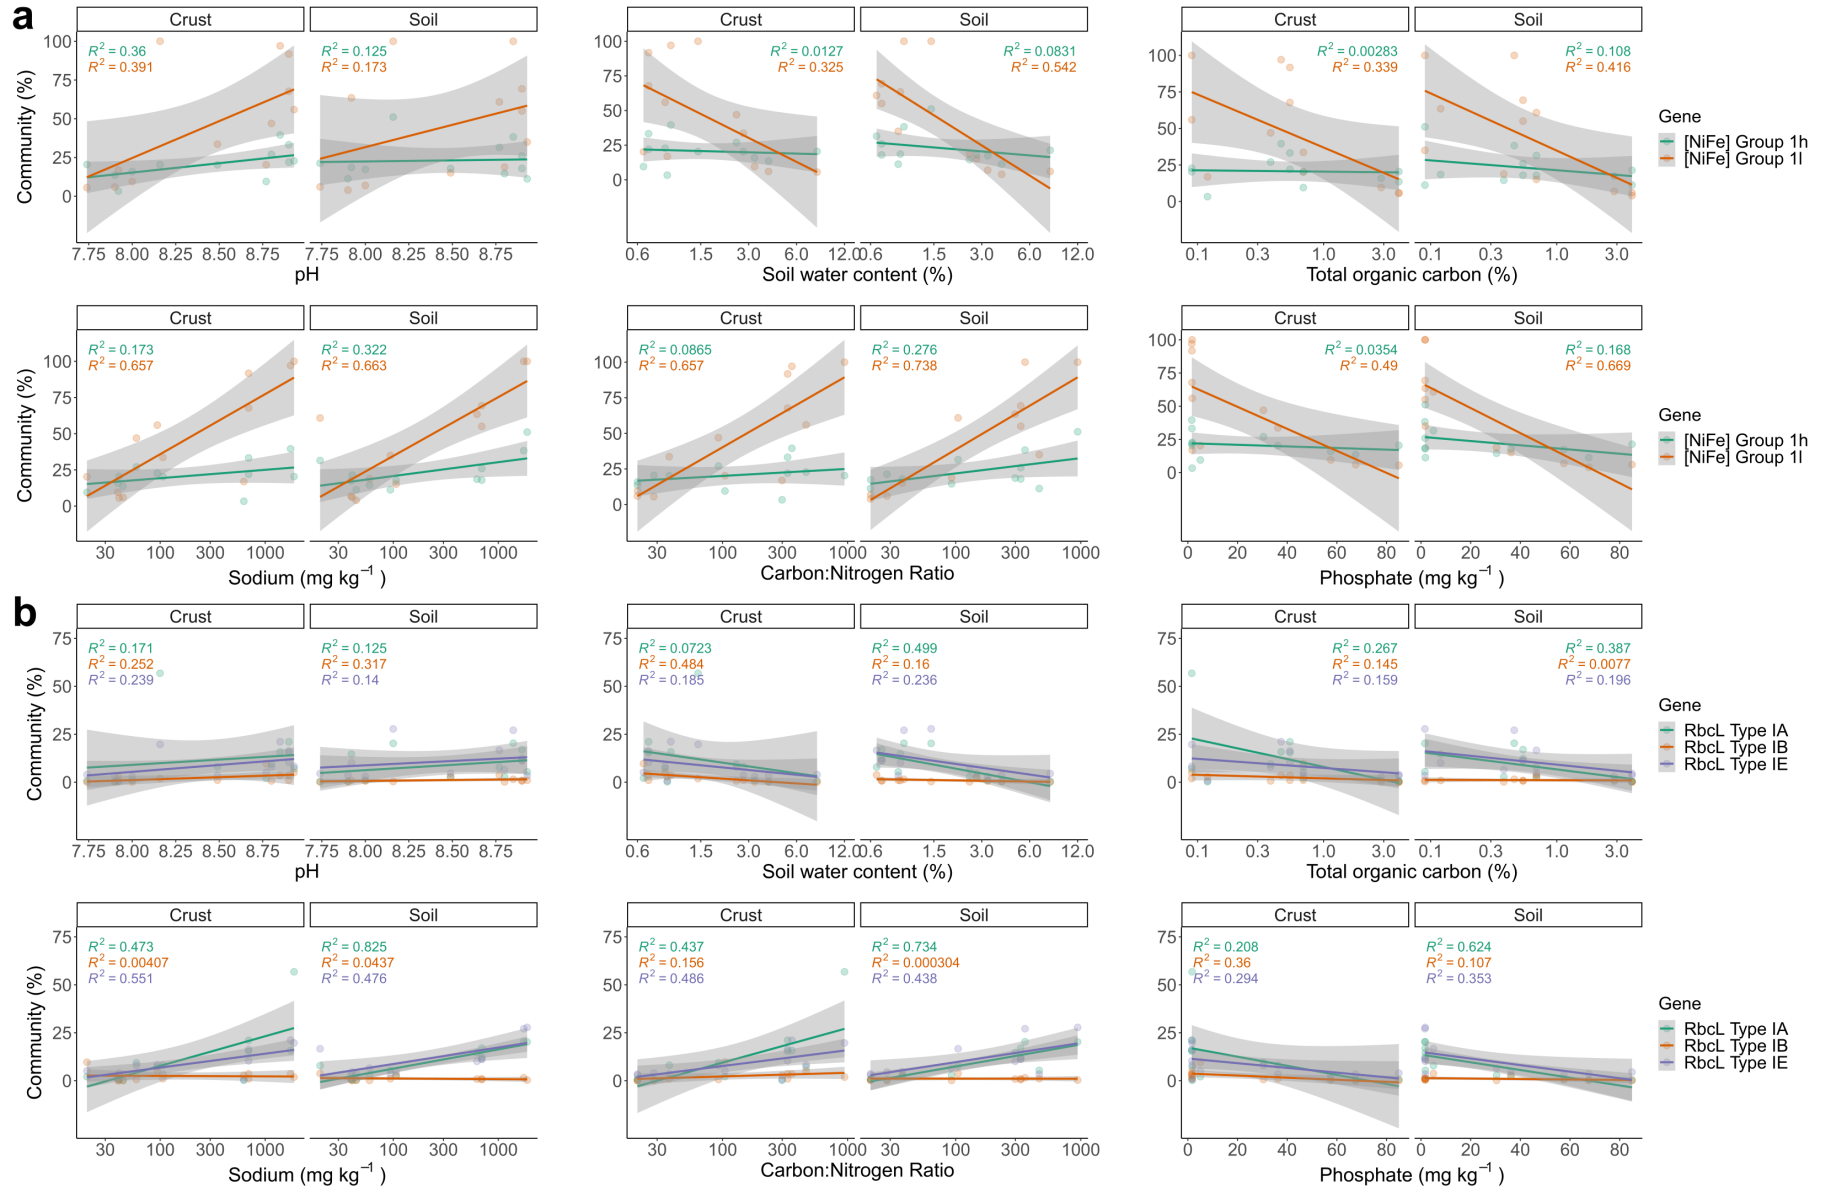

**Figure S8.** Gas chromatography measurements of biological replicate biocrusts (n = 24) and corresponding topsoil samples (n = 24). H<sub>2</sub> uptake is shown for six biological replicates from each climatic zone for soils **(a-b)** and biocrust samples **(c-d)** during dry and wet microcosm incubations. Error bars represent one standard deviation and the blue dotted line shows average global atmospheric H<sub>2</sub> concentrations (0.53 ppm).

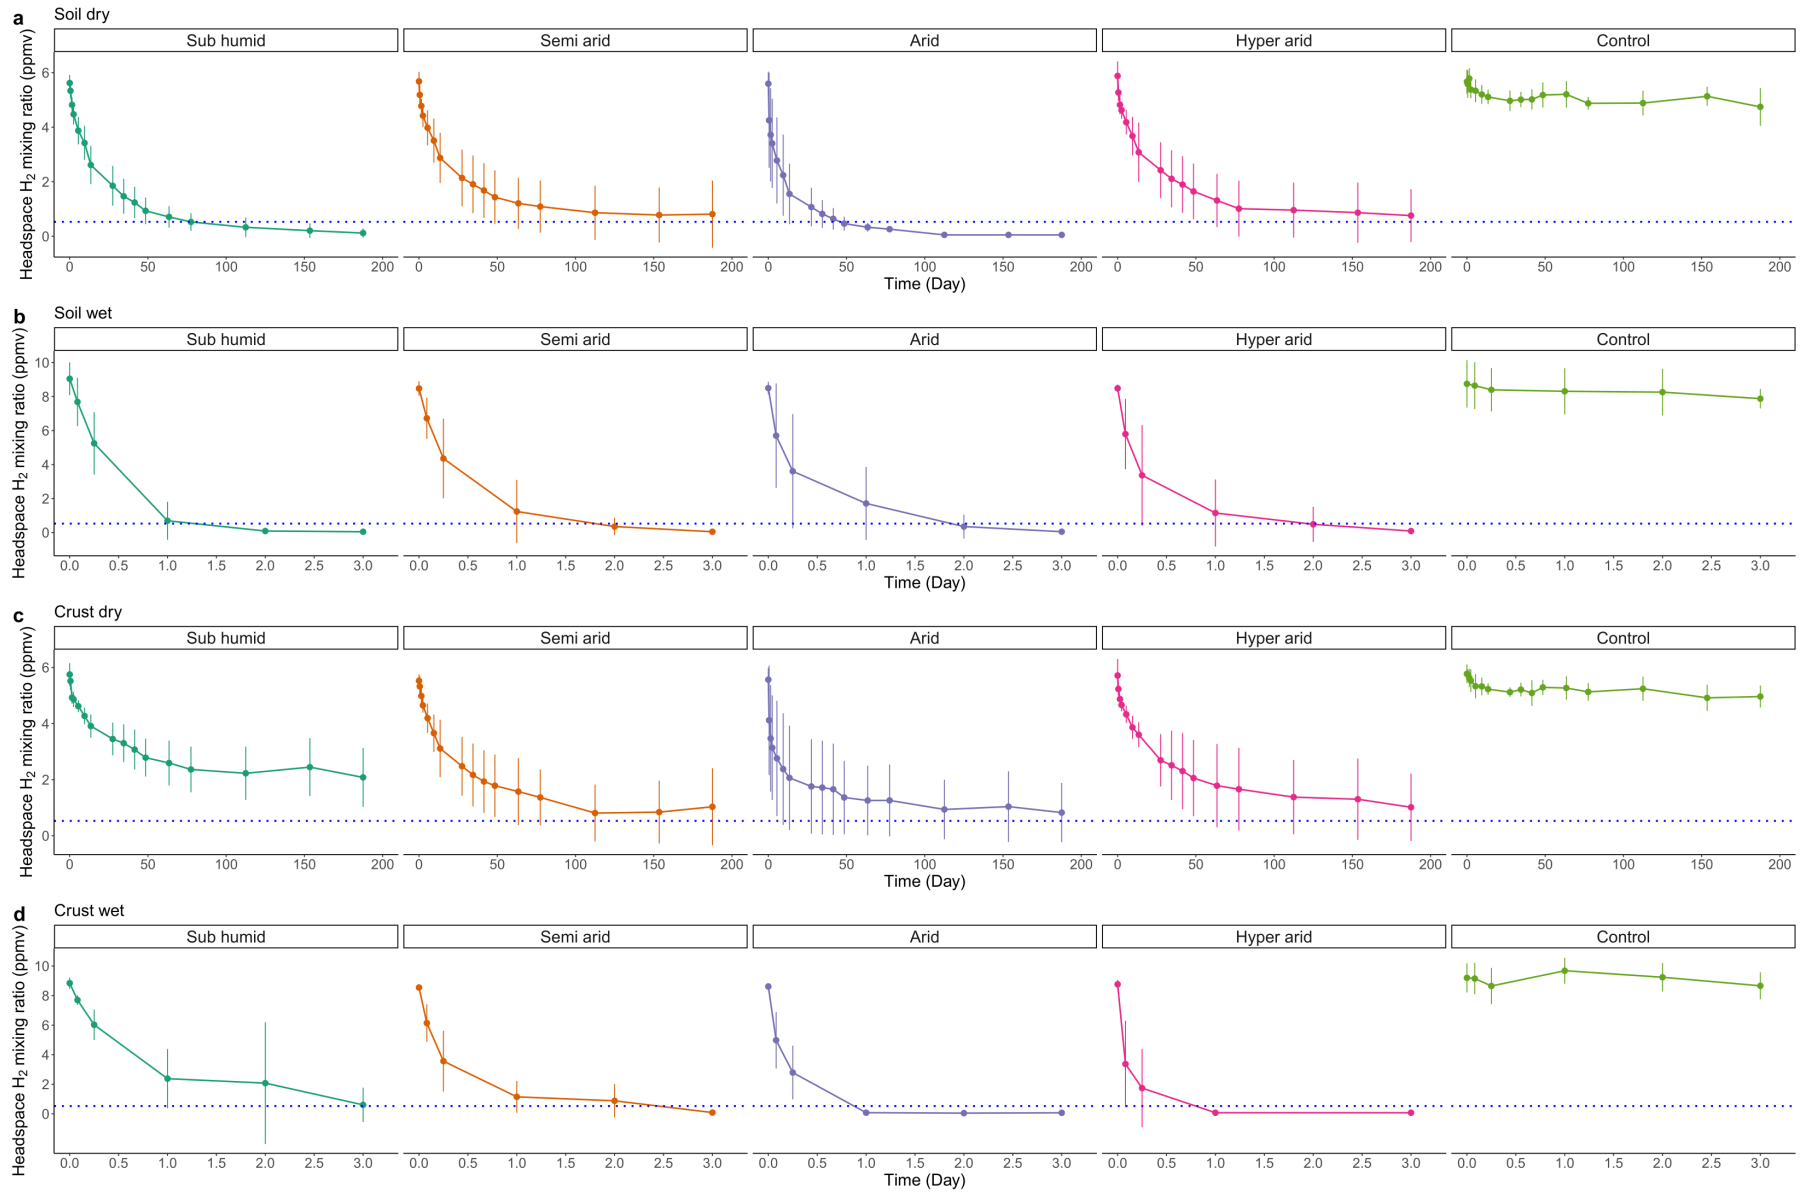

**Figure S9.** Bulk H<sub>2</sub> oxidation and carbon fixation rates in biocrusts and topsoils collected along the aridity gradient. **(a)** Uptake rates of H<sub>2</sub> oxidation measured by gas chromatography of six biological replicates per zone (n = 24) under dry and wet conditions **(b)** Rates of hydrogenotrophic carbon dioxide fixation measured by incorporation of <sup>14</sup>C-labelled CO<sub>2</sub> under H<sub>2</sub> enriched and ambient conditions. **(c)** Rates of photosynthetic carbon dioxide fixation measured by incorporation of <sup>14</sup>C-labelled CO<sub>2</sub> under light and dark conditions. Carbon dioxide fixation measurements were performed in technical triplicates using a pooled sample from each climatic zone. The box plots show median, upper and lower quartile, and minimum and maximum values.

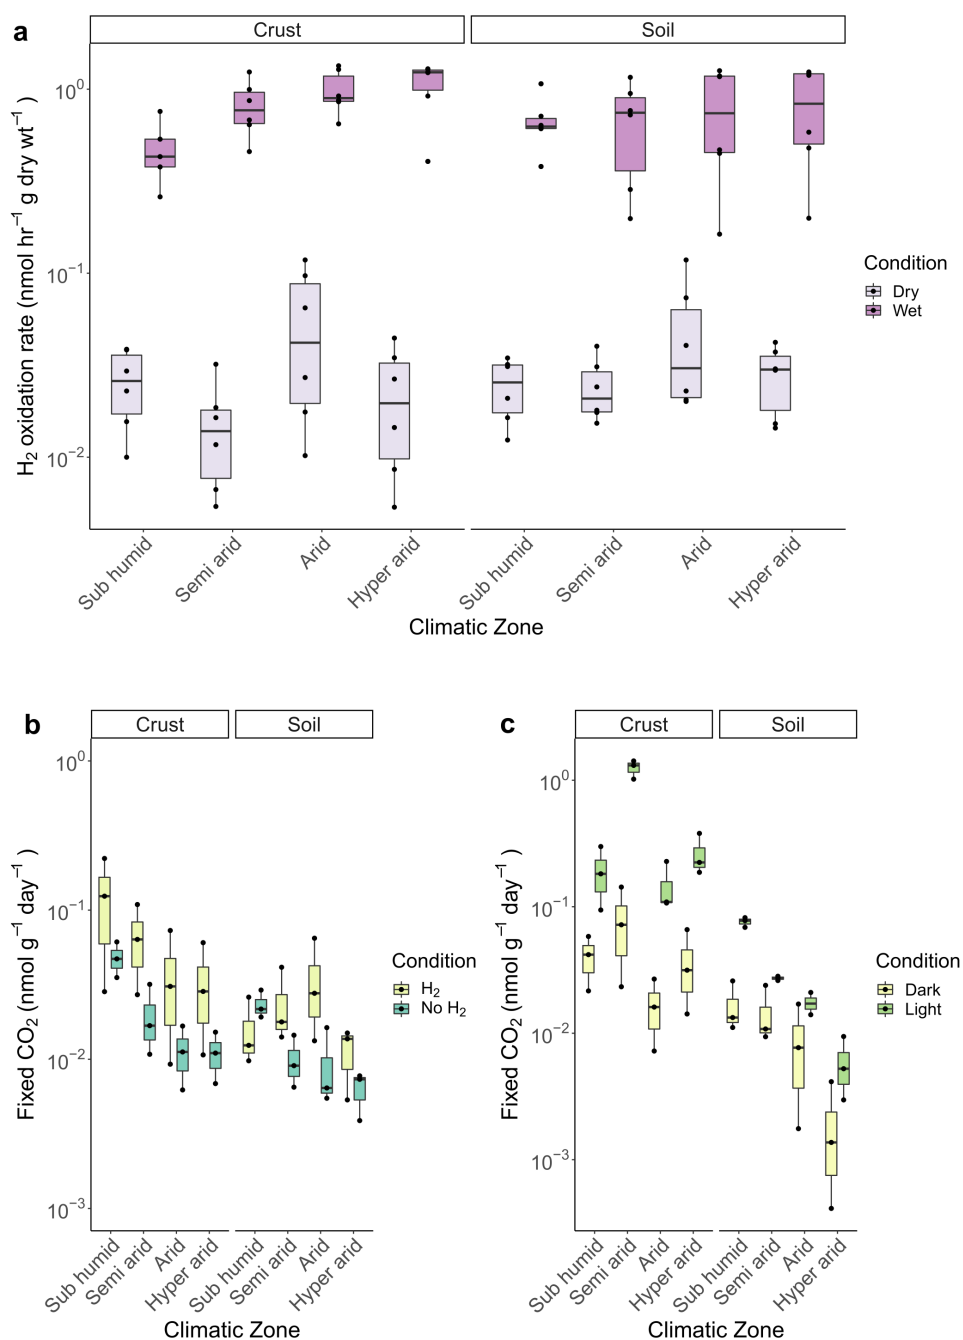

**Figure S10.** Linear models showing the correlation between H<sub>2</sub> oxidation rates normalised to 16S rRNA gene copy number and the subset of six uncorrelated edaphic chemical drivers measured along the aridity gradient.  $R^2$  values show the proportion of variance in the H<sub>2</sub> oxidation rates explained by the environmental predictor and shaded ribbons represent 95% confidence intervals.



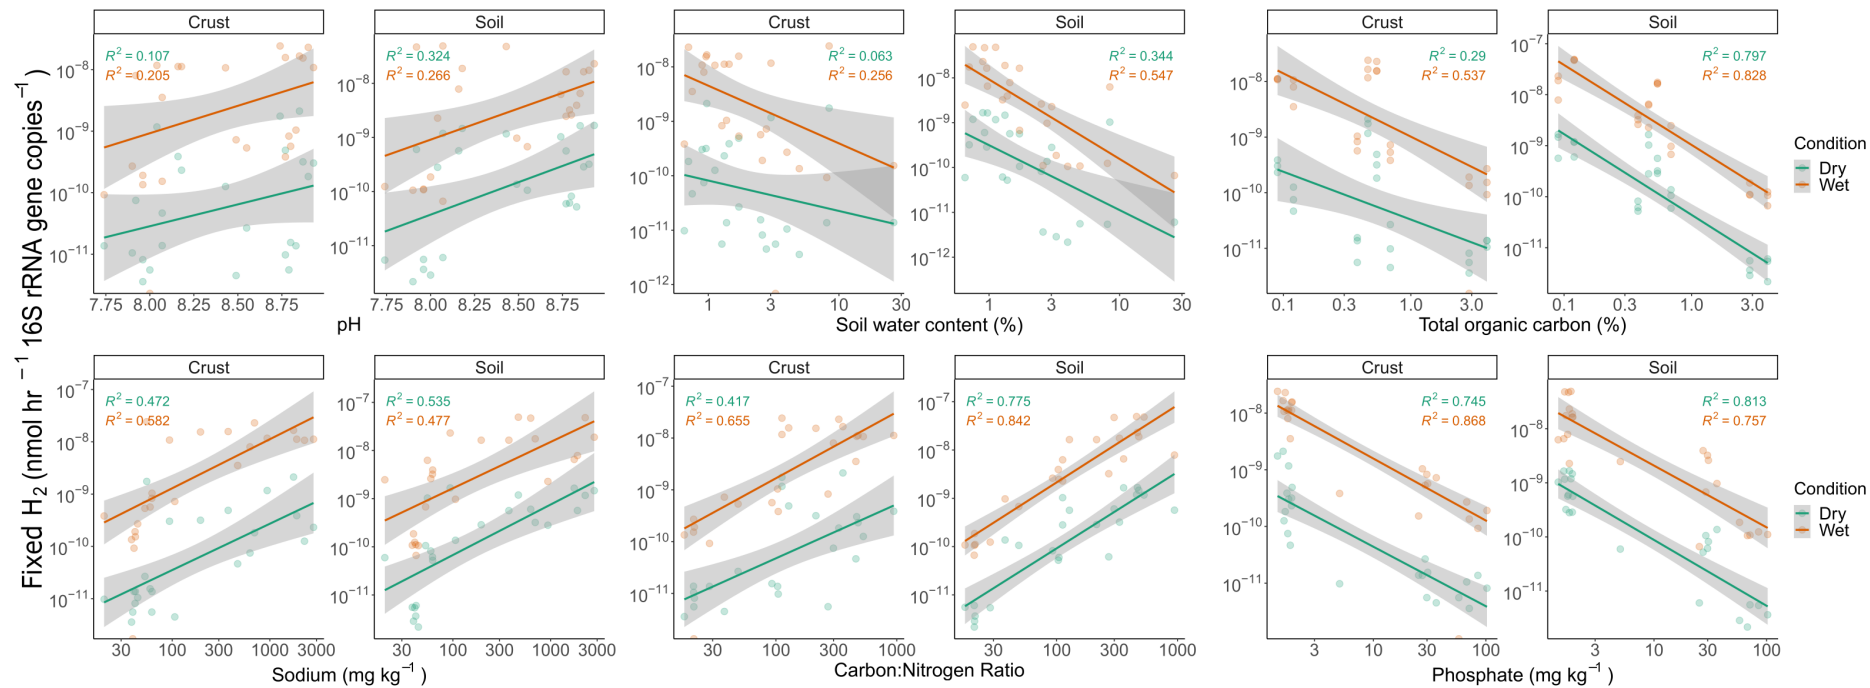

**Figure S11.** Photosynthetic and hydrogenotrophic carbon fixation activities in biocrusts and topsoils collected along the aridity gradient normalized to 16S rRNA gene copy number. **(a)** Rates of hydrogenotrophic carbon dioxide fixation measured by incorporation of  $^{14}\text{C}$ -labelled  $\text{CO}_2$  under  $\text{H}_2$  enriched and ambient conditions. **(b)** Rates of photosynthetic carbon dioxide fixation measured by incorporation of  $^{14}\text{C}$ -labelled  $\text{CO}_2$  under light and dark conditions. Carbon dioxide fixation measurements were performed in technical triplicates using a pooled sample from each climatic zone. The box plots show median, upper and lower quartile, and minimum and maximum values.

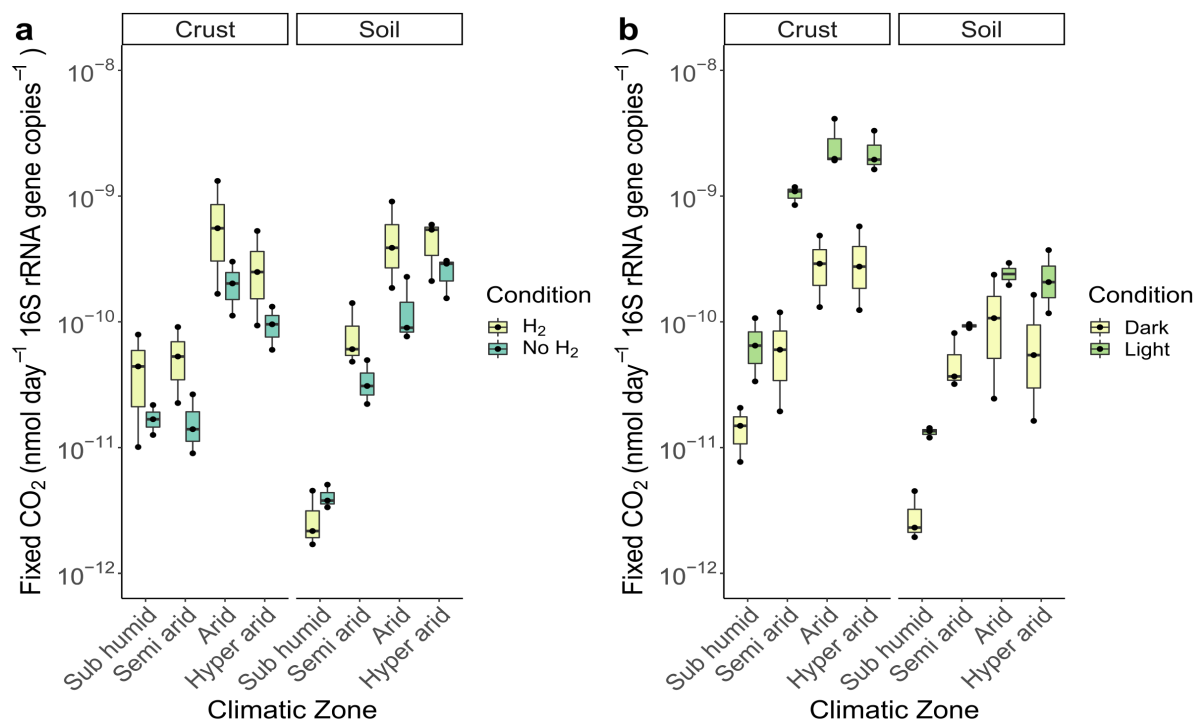

Supplement: 41396_2021_1001_MOESM1_ESM.pdf [file 41396_2021_1001_MOESM1_ESM.pdf]
